# Supplementary material
Source: publisher site journal article supplement (https://www.dovepress.com/article/372598)
Supplement: Supplementary file 1 [file get_supplementary_file.php]

**Supplementary Materials**

**Supplementary Table 1.** Institutional Review Boards and Independent Ethics Committees
for the SINUS-24 study (NCT02912468)

| Bulgaria | Ethics Committee Multicenter Trials, 5 Sveta Nedelya Square, Sofia 1000 |
| --- | --- |
| Czech Republic | Eticka Komise Fakultni Nemocnice Hradec Kralove Sokolska 581, Hradec Kralove 500 05 |
| France | CPP Sud-Méditerranée 4 Centre Hôspitalier Universitaire de Montpellier Hôpital Saint‑Eloi 2, avenue Bertin-Sans, Montpellier Cedex 05 34295 |
| Germany | Ethik-Kommission des Landes Berlin, Landesamt für Gesundheit und Soziales Berlin Geschäftsstelle der Ethik-Kommission des Landes Berlin, Fehrbelliner Platz 1, Berlin 10707 |
| Hungary | Egészségügyi Tudományos Tanács, Klinikai Farmakológiai Etikai Bizottsága, Arany János út 6-8 Budapest 1051 |
| Italy | Area Vasta Nord Ovest AOUP, Comitato per la sperimentazione clinica dei Medicinali, Via Roma 67, Pisa 56126, Pisa |
| AOU Policlinico-Vittorio, Emanuele, Via S. Sofia 78 Comitato Etico Catania 1, Catania 95123, Catania |
| Ospedale di Circolo e, Fondazione Macchi, Comitato Etico, Viale Luigi Borri 57, Varese, 21100, Varese |
| Ospedale San Raffaele, Via Olgettina 60, Comitato Etico, Milano, 20132, Milano |
| Istituto Clinico Humanitas, Comitato Etico dell'IRCCS, Istituto Clinico Humanitas di Rozzano (MI), Via Manzoni 56, Rozzano 20089, Milano |
| Comitato Etico dell'A.O. San, Paolo, Via Di Rudinì 8, Milano 20142, Milano |
| Comitato Etico Interaziendale, Bologna-Imola, Comitato Etico Interaziendale, Bologna‑imola, Via Castiglione 29, Bologna, 40124, Bologna |
| Netherlands | Medisch Ethische Toetsingscommissie Academisch, Medisch Centrum Meibergdreef 9, Amsterdam 1105 AZ |
| Poland | Komisja Bioetyczna przy Uniwersytecie Medycznym w Lodzi, Pl Hallera 1B Lodz 90-647, Lódzkie |
| Romania | Nat Bioethics Committee of Medical Product - Medical Devices, 19-21 Stefan Cel Mare Street, District 2, Bucharest 020125 |
| Russian Federation | Ethics Board at Ministry of Health of the Russian Federation, 3, Rakhmanovskiy per., Moscow, 127994 |
| LEC of the “Alliance, Biomedical – Russian, Group”, LLC, 126, Griboedov canal emb., Saint-Petersburg, 190068 |
| LEC of Saint-Petersburg, Research Institute of ENT, and Speech, 9, Bronnitskaya str., Saint-Petersburg, 190013 |
| LEC of the Federal State, Institution "Polyclinic #3", 31 Grokholsky per., Moscow, 129090 |
| LEC of the 1st Moscow State, Medical University n.a., Sechenov, 8/2 Trubetskaya Str., Moscow, 119991 |
| LEC of the Clinical, Emergency Hospital n.a., N.V.Solovyov, 11, Zagorodny Sad Str., Yaroslavl' Russia, 150003, Yaroslavl', 150003 |
| LEC of St Petersburg State, Medical University n.a., Pavlov, 10 Rentgena Str., Saint‑Petersburg, 197101 |
| Ukraine | LEC of Poltava Regional, Clinical Hospital n.a., Sklyfosofsky, 23 Shevchenko Str., Poltava, 36011 |
| LEC of the Central City, Clinical Hospital, 114, Hetmana Mazepy Str., Ivano-Frankivsk, 76000 |
| LEC of the Regional clinical, Center of Radiation, Protection, 85 Novgorodska, Str., Kharkiv, 61166 |
| LEC of the Main Military, Medical Clinical Center, CMCH of MD, 18 Hospitalna Str., Kyiv, 01133 |
| LEC of the Institute of otolaryngology n.a. prof. O.S., Kolom, 3 Zoologichna Str., Kyiv, 03680 |
| LEC of Ternopil Municipal, City Hospital №2, 14 Kupchynskogo str., Ternopil, 46000 |
| United Kingdom | Tayside Medical Science Centre, Residency Block, Level 3, Ninewells Hospital & Medical School, George Pirie Way, Dundee, DD1 9SY |
| United States | Copernicus Group IRB, 5000 Centregreen Way, Suite 200, Cary, 27513, North Carolina |
| Copernicus Group IRB, One Triangle Drive, Suite 100, Durham, 27713, North Carolina |
| Vanderbilt University IRB, 1313 21st Ave. S, Rm., 504 Oxford House, Nashville, 37232, Tennessee |
| Mayo Clinic IRB, 200 First Street SW, 201 Bldg. Room 4-60, Rochester, 55905, Minnesota |
| Western Institutional Review, Board, 1019 39th Avenue SE, Suite 120, Puyallup, 98374‑2115, Washington |
| Medical College of Wisconsin, / Froedtert Hospital, 8701 Watertown Plank Road, P.O. Box 26509, Milwaukee, 53226, Wisconsin |
| Chesapeake Research, Review IRB, 6940 Columbia Gateway, Drive, Suite 110, Columbia, 21046, Maryland |
| Office of Research Integrity, Medical University of SC, 19 Hagood Avenue, Room 601, P.O. Box 250857, Charleston, 29425, South Carolina |
